# Supplementary material for: Comparison Study of Nontreated and Fermented Wheat Varieties ‘Ada’, ‘Sarta’, and New Breed Blue and Purple Wheat Lines Wholemeal Flour
Source: MDPI journal article supplement (doi:10.3390/biology11070966), 2022-06-27
Supplement: s1 [file s1]

**Table S3.** The influence of the wheat variety and type of LAB on the acidity, chromaticity, and microbiological characteristics of the WW samples.

| Source                          | Dependent Variable | p             |
|---------------------------------|--------------------|---------------|
| Wheat variety                   | pH                 | 0.797         |
|                                 | TTA                | 0.995         |
|                                 | L                  | 0.507         |
|                                 | a                  | 0.585         |
|                                 | b                  | 0.126         |
|                                 | LAB count          | 0.705         |
| The type of LAB                 | pH                 | <b>0.0001</b> |
|                                 | TTA                | <b>0.011</b>  |
|                                 | L                  | 0.551         |
|                                 | a                  | 0.669         |
|                                 | b                  | 0.882         |
|                                 | LAB count          | <b>0.0001</b> |
| Wheat variety * The type of LAB | pH                 | 0.416         |
|                                 | TTA                | 1.000         |
|                                 | L                  | 0.852         |
|                                 | a                  | <b>0.004</b>  |
|                                 | b                  | 0.513         |
|                                 | LAB count          | 0.567         |

TTA – total titratable acidity; L\* – lightness; a\* – redness (–a\* greenness); b\* – yellowness (–b\* blueness); LAB – lactic acid bacteria. The influence of analysed factors and their interaction is significant, when  $p \leq 0.05$ . In Bold letters are marked significant values.

**Table S4.** Pearson correlations between the WW acidity, chromaticity, and microbiological characteristics.

|           |   | pH              | TTA             | L              | a     | b              | LAB count       |
|-----------|---|-----------------|-----------------|----------------|-------|----------------|-----------------|
| pH        | r | 1               | <b>-0.422**</b> | 0.007          | 0.002 | -0.146         | <b>-0.406**</b> |
|           | p |                 | 0.003           | 0.962          | 0.990 | 0.321          | 0.004           |
| TTA       | r | <b>-0.422**</b> | 1               | <b>0.578**</b> | 0.073 | <b>0.341*</b>  | 0.195           |
|           | p | 0.003           |                 | 0.0001         | 0.624 | 0.018          | 0.184           |
| L         | r | 0.007           | <b>0.578**</b>  | 1              | 0.031 | <b>0.403**</b> | -0.268          |
|           | p | 0.962           | 0.0001          |                | 0.833 | 0.005          | 0.065           |
| a         | r | -0.002          | 0.073           | 0.031          | 1     | -0.049         | 0.042           |
|           | p | 0.990           | 0.624           | 0.833          |       | 0.743          | 0.776           |
| b         | r | -0.146          | <b>0.341*</b>   | <b>0.403**</b> | 0.049 | 1              | -0.138          |
|           | p | 0.321           | 0.018           | 0.005          | 0.743 |                | 0.351           |
| LAB count | r | <b>-0.406**</b> | 0.195           | -0.268         | 0.042 | -0.138         | 1               |
|           | p | 0.004           | 0.184           | 0.065          | 0.776 | 0.351          |                 |

r - Pearson Correlation; p – significance; TTA – total titratable acidity; L\* – lightness; a\* – redness (–a\* greenness); b\* – yellowness (–b\* blueness); LAB – lactic acid bacteria; \*\* Correlation is significant at the 0.01 level (2-tailed). \* Correlation is significant at the 0.05 level (2-tailed).

In Bold letters are marked significant values.
