# Supplementary material for: Comparison Study of Nontreated and Fermented Wheat Varieties ‘Ada’, ‘Sarta’, and New Breed Blue and Purple Wheat Lines Wholemeal Flour
Source: MDPI journal article supplement (doi:10.3390/biology11070966), 2022-06-27
Supplement: s1 [file s1]

**Table S5.** The influence of the wheat variety and type of LAB on the biogenic amines content in WW samples.

| Source                             | Dependent Variable | p      |
|------------------------------------|--------------------|--------|
| Wheat variety                      | Phenylethylamine   | 0.0001 |
|                                    | Putrescine         | 0.0001 |
|                                    | Cadaverine         | 0.0001 |
|                                    | Histamine          | 0.006  |
|                                    | Tyramine           | 0.004  |
|                                    | Spermidine         | 0.0001 |
| The type of LAB                    | Phenylethylamine   | 0.0001 |
|                                    | Putrescine         | 0.0001 |
|                                    | Cadaverine         | 0.0001 |
|                                    | Histamine          | 0.0001 |
|                                    | Tyramine           | 0.004  |
|                                    | Spermidine         | 0.0001 |
| Wheat variety *<br>The type of LAB | Phenylethylamine   | 0.0001 |
|                                    | Putrescine         | 0.0001 |
|                                    | Cadaverine         | 0.0001 |
|                                    | Histamine          | 0.0001 |
|                                    | Tyramine           | 0.0001 |
|                                    | Spermidine         | 0.0001 |

LAB – lactic acid bacteria. The influence of analysed factors and their interaction is significant, when  $p \leq 0.05$ .

**Table S6.** Pearson correlations between the WW acidity, chromaticity, and microbiological characteristics.

|           |   | pH              | TTA             | LAB<br>count    | PHE            | PUTR           | CAD            | HIS             | TYR    | SPRMD           |
|-----------|---|-----------------|-----------------|-----------------|----------------|----------------|----------------|-----------------|--------|-----------------|
| pH        | r | 1               | <b>-0.422**</b> | <b>-0.406**</b> | <b>0.389**</b> | -0.064         | -0.270         | -0.130          | 0.036  | -0.247          |
|           | p |                 | 0.003           | 0.004           | 0.006          | 0.664          | 0.064          | 0.380           | 0.808  | 0.090           |
| TTA       | r | <b>-0.422**</b> | 1               | 0.195           | -0.272         | 0.029          | 0.262          | 0.057           | 0.222  | 0.153           |
|           | p | 0.003           |                 | 0.184           | 0.061          | 0.844          | 0.072          | 0.700           | 0.130  | 0.300           |
| LAB count | r | <b>-0.406**</b> | 0.195           | 1               | -0.230         | -0.031         | 0.202          | 0.091           | 0.160  | <b>0.422**</b>  |
|           | p | 0.004           | 0.184           |                 | 0.116          | 0.833          | 0.168          | 0.536           | 0.276  | 0.003           |
| PHE       | r | <b>0.389**</b>  | -0.272          | -0.230          | 1              | 0.053          | -0.137         | -0.069          | -0.057 | -0.365*         |
|           | p | 0.006           | 0.061           | 0.116           |                | 0.720          | 0.353          | 0.642           | 0.701  | 0.011           |
| PUTR      | r | -0.064          | 0.029           | -0.031          | 0.053          | 1              | <b>0.639**</b> | <b>0.434**</b>  | -0.171 | <b>-0.322*</b>  |
|           | p | 0.664           | 0.844           | 0.833           | 0.720          |                | 0.0001         | 0.002           | 0.246  | 0.026           |
| CAD       | r | -0.270          | 0.262           | 0.202           | -0.137         | <b>0.639**</b> | 1              | 0.227           | 0.250  | -0.132          |
|           | p | 0.064           | 0.072           | 0.168           | 0.353          | 0.0001         |                | 0.120           | 0.086  | 0.372           |
| HIS       | r | -0.130          | 0.057           | 0.091           | -0.069         | <b>0.434**</b> | 0.227          | 1               | -0.069 | <b>-0.430**</b> |
|           | p | 0.380           | 0.700           | 0.536           | 0.642          | 0.002          | 0.120          |                 | 0.642  | 0.002           |
| TYR       | r | 0.036           | 0.222           | 0.160           | -0.057         | -0.171         | 0.250          | -0.069          | 1      | 0.104           |
|           | p | 0.808           | 0.130           | 0.276           | 0.701          | 0.246          | 0.086          | 0.642           |        | 0.481           |
| SPRMD     | r | -0.247          | 0.153           | <b>0.422**</b>  | <b>-0.365*</b> | <b>-0.322*</b> | -0.132         | <b>-0.430**</b> | 0.104  | 1               |
|           | p | 0.090           | 0.300           | 0.003           | 0.011          | 0.026          | 0.372          | 0.002           | 0.481  |                 |

r - Pearson Correlation; p – significance; TTA – total titratable acidity; LAB – lactic acid bacteria; PHE – phenylethylamine; PUTR – putrescine; CAD – cadaverine; HIS – histamine; TYR – tyramine; SPRMD – spermidine.

\*\* Correlation is significant at the 0.01 level (2-tailed). \* Correlation is significant at the 0.05 level (2-tailed).

In Bold letters are marked significant values.
