# Supplementary material for: Comparison Study of Nontreated and Fermented Wheat Varieties ‘Ada’, ‘Sarta’, and New Breed Blue and Purple Wheat Lines Wholemeal Flour
Source: MDPI journal article supplement (doi:10.3390/biology11070966), 2022-06-27
Supplement: s1 [file s1]

## Instrumental parameters for the HPLC-MS/MS analysis of mycotoxins

### 1) HPLC parameters

Phase A – 0.1% formic acid, 0,5mM ammonium acetate in water

Phase B - 0.1% formic acid, 0,5mM ammonium acetate in methanol

**Table S1.** HPLC parameters.

| Time, min | Flow Gradient |      |
|-----------|---------------|------|
|           | A, %          | B, % |
| 0,0       | 85            | 15   |
| 1,0       | 85            | 15   |
| 4,5       | 2             | 98   |
| 5,2       | 2             | 98   |
| 6,5       | 90            | 10   |
| 7,5       | 90            | 10   |
| 8,5       | 85            | 15   |
| 10,5      | 85            | 15   |

### 2) MS/MS parameters

Method Duration (min): **10,5**

#### Ion Source

Ion Source Type: **H-ESI**

Spray Voltage: **Static**

Positive Ion (V): **3500**

Negative Ion (V): **2500**

Sheath Gas (Arb): **55**

Aux Gas (Arb): **25**

Sweep Gas (Arb): **5**

Ion Transfer Tube Temp (°C): **300**

Vaporizer Temp (°C): **350**

#### SRM Scan:

Use Cycle Time: **True**

Cycle Time (sec): **0.4**

Use Calibrated RF Lens: **True**

Q1 Resolution (FWHM): **0.7**

Q3 Resolution (FWHM): **1.2**

CID Gas (mTorr): **1.5**

**Table S2.** Analysed compound retention time, precursor and product  $m/z$ .

| Compound       | Analysed compound retention time, precursor and product $m/z$ |      |                 |               | Collision energy, V |
|----------------|---------------------------------------------------------------|------|-----------------|---------------|---------------------|
|                | Retention time, min                                           | Mode | Precursor $m/z$ | Product $m/z$ |                     |
| Aflatoxin B1   | 6,06                                                          | +    | 313             | 213           | 43                  |
|                |                                                               |      |                 | 241           | 37                  |
|                |                                                               |      |                 | 273           | 22                  |
| Deoxynivalenol | 2,08                                                          | +    | 297             | 231           | 12                  |
|                |                                                               |      |                 | 249           | 11                  |
| Ochratoxin A   | 7,00                                                          | +    | 404             | 239           | 25                  |
|                |                                                               |      |                 | 358           | 13                  |
| Fumonisin B1   | 6,44                                                          | +    | 722             | 334           | 21                  |
|                |                                                               |      |                 | 352           | 40                  |
| Fumonisin B2   | 6,86                                                          | +    | 706             | 318           | 36                  |
|                |                                                               |      |                 | 336           | 38                  |
| T-2            | 6,75                                                          | +    | 489             | 327           | 23                  |
|                |                                                               |      |                 | 387           | 21                  |
| HT-2           | 6,49                                                          | +    | 442             | 215           | 10                  |
|                |                                                               |      |                 | 263           | 10                  |
| Zearalenone    | 6,99                                                          | -    | 317             | 273           | 18                  |
|                |                                                               |      |                 | 157           | 24                  |
