# Supplementary material for: Comparison Study of Nontreated and Fermented Wheat Varieties ‘Ada’, ‘Sarta’, and New Breed Blue and Purple Wheat Lines Wholemeal Flour
Source: MDPI journal article supplement (doi:10.3390/biology11070966), 2022-06-27
Supplement: s1 [file s1]

**Table S9.** Volatile compounds, which in at least one wheat whole meal sample is >5%.

| RT   | Volatile compound              | 'Ada'           | 'Ada' LUHS29    | 'Ada' LUHS245 | 'Ada' LUHS122   | 'Sarta'         | 'Sarta' LUHS29 | 'Sarta' LUHS245 | 'Sarta' LUHS122 | DS8472-5        | DS8472-5 LUHS29 | DS8472-5 LUHS245 | DS8472-5 LUHS122 | DS8526-2        | DS8526-2 LUHS29 | DS8526-2 LUHS245 | DS8526-2 LUHS122 |
|------|--------------------------------|-----------------|-----------------|---------------|-----------------|-----------------|----------------|-----------------|-----------------|-----------------|-----------------|------------------|------------------|-----------------|-----------------|------------------|------------------|
| 2.34 | Acetic acid                    | nd              | 31.8<br>±2.8    | 11.7<br>±0.7  | 6.34<br>±0.41   | nd              | 13.4<br>±1.1   | 4.26<br>±0.34   | 10.7<br>±0.9    | nd              | 23.3<br>±2.2    | nd               | 6.36<br>±0.32    | nd              | 11.3<br>±0.6    | nd               | 1.95±0.14        |
| 3.13 | 1-Butanol                      | nd              | nd              | nd            | nd              | nd              | nd             | nd              | nd              | nd              | nd              | nd               | nd               | nd              | nd              | nd               | 8.03±0.56        |
| 3.75 | Acetoin                        | 32.8<br>±2.6    | nd              | nd            | nd              | 5.21<br>±0.36   | nd             | nd              | nd              | 6.65<br>±0.59   | nd              | nd               | nd               | nd              | nd              | nd               | nd               |
| 4.99 | 1-Pentanol                     | 27.7<br>±1.4    | 2.00<br>±0.11   | nd            | nd              | nd              | 2.34<br>±0.18  | 1.66<br>±0.13   | nd              | nd              | nd              | nd               | nd               | nd              | nd              | nd               | nd               |
| 5.50 | 2,3-Butanediol                 | 22.1<br>±2.1    | nd              | 3.20<br>±0.19 | 48.3<br>±3.1    | 10.4<br>±0.7    | nd             | nd              | nd              | 53.8<br>±4.8    | nd              | 12.3<br>±1.2     | 1.94<br>±0.09    | 61.1<br>±3.4    | nd              | 38.4±2.5         | 0.739±0.051      |
| 5.75 | Hexanal                        | nd              | 2.67<br>±0.15   | 6.16<br>±0.37 | nd              | 29.9<br>±2.1    | 6.66<br>±0.50  | 12.7±<br>1.1    | 28.8<br>±2.4    | nd              | nd              | nd               | nd               | nd              | 5.21<br>±0.31   | nd               | nd               |
| 5.83 | Ethyl butyrate                 | nd              | nd              | nd            | nd              | nd              | nd             | nd              | nd              | nd              | nd              | nd               | nd               | nd              | nd              | nd               | 19.9±1.4         |
| 6.10 | Ethyl lactate                  | nd              | 3.61<br>±0.21   | nd            | nd              | nd              | 5.05<br>±0.38  | nd              | nd              | nd              | 5.99<br>±0.57   | nd               | nd               | nd              | nd              | nd               | nd               |
| 7.14 | Butanoic acid                  | nd              | nd              | nd            | nd              | nd              | nd             | nd              | nd              | nd              | nd              | nd               | nd               | nd              | nd              | nd               | 37.4<br>±2.6     |
| 7.57 | 1-Hexanol                      | 5.80<br>±0.29   | 6.70<br>±0.37   | 5.43<br>±0.33 | 3.27<br>±0.21   | 20.5<br>±1.44   | 10.0<br>±0.8   | 4.75<br>±0.38   | 2.30<br>±0.20   | 9.89<br>±0.89   | 7.78<br>±0.74   | 10.13<br>±1.01   | 0.321<br>±0.016  | 6.55<br>±0.36   | 4.66<br>±0.28   | 4.30<br>±0.28    | nd               |
| 8.04 | L-Lactic acid                  | nd              | 2.42<br>±0.13   | 4.72<br>±0.29 | nd              | nd              | nd             | 0.956<br>±0.076 | nd              | nd              | nd              | 9.33<br>±0.93    | nd               | nd              | 7.41<br>±0.44   | nd               | nd               |
| 9.74 | 4-methylpentanoic acid         | nd              | nd              | nd            | nd              | nd              | nd             | nd              | nd              | nd              | nd              | nd               | 54.8<br>±4.7     | nd              | nd              | nd               | nd               |
| 9.87 | 2-Heptenal                     | 0.175<br>±0.009 | 1.13<br>±0.06   | 3.89<br>±0.23 | 0.616<br>±0.041 | nd              | 4.44<br>±0.33  | 6.21<br>±0.50   | 1.85<br>±0.16   | 0.910<br>±0.082 | 0.640<br>±0.064 | 2.69<br>±0.27    | nd               | nd              | 3.21<br>±0.19   | 0.910<br>±0.059  | 0.177<br>±0.012  |
| 10.5 | Hexanoic acid                  | nd              | 5.20<br>±0.29   | 2.55<br>±0.16 | 1.65<br>±0.11   | 4.63<br>±0.32   | 4.27<br>±0.32  | 3.56<br>±0.28   | 2.52<br>±0.21   | nd              | 9.07<br>±0.86   | 5.04<br>±0.50    | 0.753<br>±0.038  | nd              | 2.97<br>±0.18   | 2.70<br>±0.18    | 0.543<br>±0.038  |
| 10.7 | 2-pentylfuran                  | 0.780<br>±0.041 | 4.53<br>±0.25   | 3.97<br>±0.24 | 2.07<br>±0.13   | 2.63<br>±0.18   | 4.38<br>±0.34  | 5.34<br>±0.43   | 4.52<br>±0.38   | 1.26<br>±0.11   | 4.76<br>±0.45   | 4.74<br>±0.47    | nd               | nd              | 4.52<br>±0.27   | 2.24<br>±0.15    | 0.250<br>±0.018  |
| 10.8 | Butylbutanoate                 | nd              | nd              | nd            | nd              | nd              | nd             | nd              | nd              | nd              | nd              | nd               | nd               | nd              | nd              | nd               | 17.9<br>±1.3     |
| 11.0 | Hexanoic acid ethyl ester      | nd              | 2.56<br>±0.14   | nd            | 1.62<br>±0.11   | nd              | 2.46<br>±0.18  | nd              | 3.05<br>±0.26   | nd              | 5.07<br>±0.48   | 3.45<br>±0.35    | 22.4<br>±1.1     | nd              | 1.80<br>±0.11   | 3.00<br>±0.20    | nd               |
| 11.8 | 3-ethyl-2-methyl-1,3-hexadiene | nd              | 3.92<br>±0.22   | 9.48<br>±0.57 | 4.76<br>±0.31   | 0.928<br>±0.065 | 6.26<br>±0.47  | 8.34<br>±0.67   | 3.99<br>±0.34   | nd              | 3.53<br>±0.34   | 9.83<br>±0.98    | 1.58<br>±0.08    | 0.725<br>±0.040 | 7.58<br>±0.45   | 5.87<br>±0.38    | 0.768<br>±0.054  |
| 12.1 | Benzeneacetaldehyde            | nd              | 3.55<br>±0.21   | 3.21<br>±0.18 | 3.70<br>±0.25   | nd              | 2.78<br>±0.21  | 2.43<br>±0.19   | 2.70<br>±0.23   | nd              | 3.22<br>±0.31   | 2.51<br>±0.25    | 1.18<br>±0.06    | nd              | 3.35<br>±0.20   | 3.14<br>±0.20    | 0.669<br>±0.047  |
| 12.4 | Oct-(2E)-enal                  | 1.03<br>±0.05   | 4.90<br>±0.27   | 12.6<br>±0.77 | 5.43<br>±0.35   | 4.19<br>±0.29   | 8.24<br>±0.67  | 14.1<br>±1.1    | 8.97<br>±0.76   | 1.61<br>±0.14   | nd              | 6.37<br>±0.64    | 0.664<br>±0.033  | 1.26<br>±0.07   | 11.4<br>±0.7    | 5.96<br>±0.39    | 2.00<br>±0.14    |
| 17.6 | 4-ethylguaiaicol               | nd              | 0.123<br>±0.007 | nd            | 0.512<br>±0.033 | nd              | nd             | 0.356<br>±0.031 | nd              | nd              | nd              | 1.02<br>±0.10    | 0.216±<br>0.011  | 1.55<br>±0.09   | 1.61<br>±0.10   | 8.27<br>±0.54    | 1.40<br>±0.09    |
| 18.3 | Deca-(2E,4E)-dien-1-ol         | nd              | nd              | nd            | nd              | nd              | 3.39<br>±0.25  | 6.33<br>±0.51   | 6.10<br>±0.52   | 0.345<br>±0.031 | nd              | nd               | nd               | nd              | nd              | nd               | nd               |
| 18.3 | 4-vinylguaiaicol               | nd              | 1.30<br>±0.07   | 5.51<br>±0.33 | 7.69<br>±0.49   | 5.91<br>±0.41   | nd             | nd              | nd              | nd              | 3.06<br>±0.29   | 6.66<br>±0.66    | 1.67<br>±0.08    | 16.2<br>±0.89   | 6.10<br>±0.37   | 8.28<br>±0.57    | nd               |

LUHS29 – fermented with *Pediococcus acidilactici* LUHS29 strain; LUHS245 – fermented with *Lactobacillus uvarum* LUHS245strain; LUHS122 – fermented with *Lactobacillus plantarum* LUHS122 strain. Data are represented as means (n = 3)) ± SE.

**Table S10.** Volatile compounds, which in at least one wheat whole meal sample is >1 and <5%.

| RT   | Volatile compound                                              | 'Ada'           | 'Ada'           | 'Ada'           | 'Ada'           | 'Sarta'         | 'Sarta'         | 'Sarta'         | 'Sarta'         | DS8472-5        | DS8472-5        | DS8472-5        | DS8472-5        | DS8526-2        | DS8526-2        | DS8526-2        | DS8526-2        |
|------|----------------------------------------------------------------|-----------------|-----------------|-----------------|-----------------|-----------------|-----------------|-----------------|-----------------|-----------------|-----------------|-----------------|-----------------|-----------------|-----------------|-----------------|-----------------|
|      |                                                                |                 | LUHS29          | LUHS245         | LUHS122         |
| 8.71 | 2,5-dimethylpyrazine                                           | nd              | nd              | 0.246<br>±0.022 | nd              | nd              | nd              | nd              | nd              | nd              | 1.27<br>±0.08   | nd              | 0.434<br>±0.043 | nd              | 0.459<br>±0.037 | nd              | nd              |
| 9.97 | Benzaldehyde                                                   | nd              | nd              | 0.680<br>±0.061 | 0.506<br>±0.043 | nd              | nd              | 0.848<br>±0.059 | 1.42<br>±0.09   | nd              | nd              | nd              | nd              | nd              | 3.10<br>±0.25   | nd              | 0.171<br>±0.010 |
| 10.2 | 1-Heptanol                                                     | 0.551<br>±0.055 | 0.825<br>±0.078 | nd              | nd              | 1.03<br>±0.08   | 0.763<br>±0.057 | nd              | nd              | 0.549<br>±0.036 | 1.83<br>±0.11   | 0.766<br>±0.042 | nd              | 0.718<br>±0.065 | 1.37<br>±0.11   | nd              | nd              |
| 10.4 | 1-Octen-3-ol                                                   | 0.533<br>±0.053 | 3.07<br>±0.29   | 3.40<br>±0.31   | nd              | nd              | 3.47<br>±0.26   | 1.52<br>±0.11   | 2.10<br>±0.14   | 0.445<br>±0.029 | 5.68<br>±0.34   | 3.09<br>±0.17   | nd              | 0.511<br>±0.046 | 3.74<br>±0.30   | nd              | nd              |
| 12.3 | 4-methylhexanoic acid                                          | nd              | 1.44<br>±0.14   | nd              | nd              | nd              | nd              |
| 12.8 | Heptanoic acid                                                 | nd              | 0.358<br>±0.034 | 0.324<br>±0.031 | nd              | nd              | 0.386<br>±0.029 | 0.209<br>±0.014 | 0.202<br>±0.013 | nd              | 1.52<br>±0.09   | 0.522<br>±0.029 | 0.171<br>±0.017 | nd              | 0.919<br>±0.073 | 0.520<br>±0.036 | 0.024<br>±0.001 |
| 13.3 | 2-Nonanone                                                     | 0.979<br>±0.098 | 0.787<br>±0.074 | 1.90<br>±0.17   | 0.410<br>±0.034 | nd              | nd              | nd              | nd              | 0.381<br>±0.025 | 0.573<br>±0.034 | 1.26<br>±0.07   | nd              | nd              | nd              | 0.767<br>±0.053 | nd              |
| 13.6 | Nonanal                                                        | nd              | 0.791<br>±0.075 | 0.790<br>±0.071 | 0.465<br>±0.040 | 0.422<br>±0.034 | 0.629<br>±0.40  | 0.860<br>±0.060 | 0.631<br>±0.041 | 1.50<br>±0.10   | 0.217<br>±0.013 | 0.342<br>±0.019 | 0.103<br>±0.011 | nd              | 0.647<br>±0.051 | 0.412<br>±0.029 | 0.080<br>±0.005 |
| 13.8 | Phenethyl alcohol                                              | 0.499<br>±0.049 | 0.979<br>±0.093 | 0.984<br>±0.089 | 0.818<br>±0.070 | nd              | 0.274<br>±0.021 | nd              | 0.349<br>±0.022 | nd              | 1.14<br>±0.07   | 1.09<br>±0.06   | 0.265<br>±0.027 | 0.594<br>±0.053 | 0.830<br>±0.066 | 0.445<br>±0.031 | 0.093<br>±0.006 |
| 14.9 | (E)-2-Nonenal                                                  | 0.346<br>±0.004 | 0.615<br>±0.058 | 0.987<br>±0.088 | 1.24<br>±0.11   | 2.33<br>±0.19   | 1.07<br>±0.08   | 1.45<br>±0.10   | 2.75<br>±0.179  | 0.883<br>±0.057 | 0.939<br>±0.056 | 0.873<br>±0.048 | 0.531<br>±0.053 | 1.01<br>±0.09   | 1.14<br>±0.09   | 1.51<br>±0.11   | 0.476<br>±0.029 |
| 15.0 | 4-ethylphenol                                                  | nd              | 0.218<br>±0.021 | 0.253<br>±0.022 | nd              | nd              | 0.374<br>±0.028 | 0.522<br>±0.037 | nd              | nd              | 0.939<br>±0.055 | 1.14<br>±0.06   | 0.091<br>±0.090 | nd              | 1.09<br>±0.08   | nd              | 0.022<br>±0.001 |
| 15.1 | Octanoic acid                                                  | 1.01<br>±0.11   | 2.15<br>±0.20   | 2.68<br>±0.24   | 1.44<br>±0.12   | 2.02<br>±0.16   | 3.11<br>±0.23   | 3.20<br>±0.22   | 1.86<br>±0.12   | 0.892<br>±0.058 | 5.23<br>±0.31   | 2.26<br>±0.12   | 0.651<br>±0.049 | 1.24<br>±0.11   | 3.00<br>±0.24   | 1.52<br>±0.10   | 0.518<br>±0.031 |
| 15.7 | Ethyl octanoate                                                | 0.112<br>±0.011 | 0.819<br>±0.078 | 0.868<br>±0.078 | 1.14<br>±0.09   | 0.377<br>±0.030 | 0.825<br>±0.062 | 1.12<br>±0.08   | 2.72<br>±0.18   | 1.10<br>±0.07   | 1.37<br>±0.08   | 0.876<br>±0.048 | 0.329<br>±0.031 | 0.218<br>±0.019 | 0.279<br>±0.022 | 1.98<br>±0.14   | 0.345<br>±0.021 |
| 16.1 | (E,E)-2,4-Nonadienal                                           | 0.269<br>±0.027 | 0.257<br>±0.02  | 0.481<br>±0.043 | 0.156<br>±      | 0.571<br>±0.046 | 0.598<br>±0.045 | 1.39<br>±0.10   | 0.966<br>±0.063 | 0.872<br>±0.060 | 0.177<br>±0.011 | 0.399<br>±0.021 | 0.227<br>±0.026 | nd              | 0.321<br>±0.026 | 0.339<br>±0.02  | 0.178<br>±0.011 |
| 17.2 | Nonanoic acid                                                  | 1.62<br>±0.16   | 4.98<br>±0.47   | 1.86<br>±0.17   | 1.37<br>±0.17   | 3.25<br>±0.26   | 3.28<br>±0.27   | 1.44<br>±0.11   | 0.214<br>±0.014 | 1.51<br>±0.09   | 4.33<br>±0.26   | 2.28<br>±0.13   | 0.262<br>±0.060 | 2.69<br>±0.24   | 2.12<br>±0.17   | 1.63<br>±0.11   | 0.170<br>±0.010 |
| 17.9 | (E,E)-2,4-Decadienal                                           | nd              | 1.03<br>±0.09   | 3.58<br>±0.32   | 1.21<br>±0.10   | 1.73<br>±0.14   | 1.43<br>±0.11   | 3.89<br>±0.27   | 2.43<br>±0.16   | 3.54<br>±0.23   | 0.931<br>±0.056 | nd              | 0.237<br>±0.024 | 1.25<br>±0.11   | 1.92<br>±0.15   | 2.26<br>±0.16   | 1.11<br>±0.07   |
| 18.3 | 4-methyl-1-(pent-4-en-1-yl)-2,3-Diazabicyclo[2.2.1] hept-2-ene | 0.520<br>±0.052 | nd              | 8.07<br>±0.52   | nd              | nd              | nd              | nd              | nd              | nd              | 2.58<br>±0.15   |
| 18.4 | 4-ethyl-3-Nonen-5-yne                                          | nd              | 0.659<br>±0.062 | 2.26<br>±0.20   | 0.846<br>±0.071 | nd              | 2.72<br>±0.20   | 3.53<br>±0.24   | 1.32<br>±0.09   | nd              | 0.406<br>±0.024 | 3.03<br>±0.17   | 0.209<br>±0.022 | nd              | 3.65<br>±0.29   | 0.872<br>±0.061 | 0.300<br>±0.018 |
| 19.0 | Ethylhydrocinnamate                                            | nd              | 1.06<br>±0.11   | nd              | nd              | nd              | nd              |
| 19.4 | dihydro-5-pentyl-2(3H)-Furanone                                | 0.255<br>±0.025 | 0.536<br>±0.051 | 0.605<br>±0.054 | 0.398<br>±0.033 | 1.59<br>±0.13   | 1.23<br>±0.09   | 0.945<br>±0.066 | 0.865<br>±0.057 | 0.528<br>±0.034 | 1.05<br>±0.06   | 0.931<br>±0.051 | 0.223<br>±0.021 | 0.843<br>±0.076 | 0.890<br>±0.071 | 0.591<br>±0.041 | 0.154<br>±0.009 |
| 19.7 | trans-4,5-Epoxy-(E)-2-decenal                                  | nd              | 0.388<br>±0.037 | 1.64<br>±0.15   | 0.366<br>±0.031 | nd              | 0.988<br>±0.074 | 2.56<br>±0.18   | 0.956<br>±0.062 | nd              | nd              | 0.570<br>±0.031 | 0.081<br>±0.009 | 0.214<br>±0.019 | 0.847<br>±0.067 | 0.418<br>±0.029 | 0.237<br>±0.014 |
| 23.0 | Dodecanoic acid                                                | nd              | 0.113<br>±0.007 | 2.06<br>±0.12   | 0.543<br>±0.029 | 0.046<br>±0.005 | 0.115<br>±0.010 | 0.263<br>±0.021 | 0.728<br>±0.050 | 0.028<br>±0.002 |

LUHS29 – fermented with *Pediococcus acidilactici* LUHS29 strain; LUHS245 – fermented with *Lactobacillus uvarum* LUHS245strain; LUHS122 – fermented with *Lactobacillus plantarum* LUHS122 strain. Data are represented as means (n = 3)) ± SE.

**Table S11.** Volatile compounds, which in at least one wheat whole meal sample is <1%.

| RT   | Volatile compound                       | 'Ada'           | 'Ada' LUHS29    | 'Ada' LUHS245   | 'Ada' LUHS122   | 'Sarta'         | 'Sarta' LUHS29  | 'Sarta' LUHS245 | 'Sarta' LUHS122 | DS8472-5        | DS8472-5 LUHS29 | DS8472-5 LUHS245 | DS8472-5 LUHS122 | DS8526-2        | DS8526-2 LUHS29 | DS8526-2 LUHS245 | DS8526-2 LUHS122 |
|------|-----------------------------------------|-----------------|-----------------|-----------------|-----------------|-----------------|-----------------|-----------------|-----------------|-----------------|-----------------|------------------|------------------|-----------------|-----------------|------------------|------------------|
| 7.45 | 3-methylbutanoic acid                   | nd               | nd               | nd              | nd              | nd               | 0.033<br>±0.002  |
| 7.60 | 2-methylbutanoic acid                   | nd               | nd               | nd              | nd              | nd               | 0.033<br>±0.002  |
| 8.18 | Pentanoic acid                          | nd              | 1.04<br>±0.07   | 0.611<br>±0.031 | nd               | nd               | nd              | 0.657<br>±0.057 | nd               | nd               |
| 8.40 | Heptanal                                | nd              | nd              | nd              | nd              | 0.927<br>±0.079 | nd              | nd              | nd              | nd              | nd              | nd               | nd               | nd              | nd              | nd               | nd               |
| 11.2 | (E,E)-2,4-heptadienal                   | nd              | nd              | nd              | nd              | nd              | 0.255<br>±0.019 | 0.253<br>±0.016 | 0.175<br>±0.167 | nd              | nd              | nd               | nd               | nd              | nd              | nd               | 0.104<br>±0.007  |
| 11.2 | Hexyl acetate                           | nd              | nd              | nd              | nd              | nd              | 0.705<br>±0.053 | 0.176<br>±0.011 | 0.216<br>±0.021 | nd              | nd              | nd               | nd               | nd              | nd              | nd               | nd               |
| 11.3 | Acetic acid hexyl ester                 | nd              | 0.426<br>±0.032 | nd              | 0.098<br>±0.009 | nd              | nd              | nd              | nd              | nd              | 0.351<br>±0.028 | nd               | nd               | nd              | nd              | nd               | nd               |
| 11.9 | Oct-3-en-2-one                          | nd              | 0.413<br>±0.039 | nd              | nd              | nd               | nd               | nd              | nd              | nd               | nd               |
| 12.7 | (E)-2-Octen-1-ol                        | 0.170<br>±0.014 | nd              | nd              | nd              | 0.506<br>±0.043 | 0.554<br>±0.042 | 0.365<br>±0.024 | 0.378<br>±0.036 | 0.353<br>±0.032 | 0.574<br>±0.046 | 0.578<br>±0.041  | 0.192<br>±0.012  | 0.478<br>±0.045 | nd              | 0.448<br>±0.033  | nd               |
| 12.7 | 1-Octanol                               | 0.346<br>±0.028 | 0.704<br>±0.049 | 1.12<br>±0.06   | 0.727<br>±0.065 | 0.363<br>±0.031 | 1.03<br>±0.08   | 0.755<br>±0.049 | 0.608<br>±0.055 | 0.638<br>±0.044 | 0.551<br>±0.052 | 0.638<br>±0.044  | 0.551<br>±0.052  | 0.638<br>±0.052 | nd              | nd               | nd               |
| 13.3 | 2-butyltetrahydrofuran                  | nd              | nd              | nd              | nd              | nd              | 0.241<br>±0.018 | 1.14<br>±0.07   | 1.45<br>±0.14   | nd              | nd              | nd               | 0.277<br>±0.017  | nd              | 0.228<br>±0.019 | nd               | 0.205<br>±0.014  |
| 13.4 | Heptanoic acid ethyl ester              | nd              | nd              | nd              | 0.188<br>±0.017 | nd              | nd              | nd              | nd              | nd              | 0.184<br>±0.015 | nd               | 0.141<br>±0.008  | nd              | nd              | 0.120<br>±0.009  | nd               |
| 13.4 | (Z)-2-Nonen-4-yn-1-ol                   | nd              | 0.804<br>±0.076 | nd              | nd              | nd               | nd               | nd              | nd              | nd               | nd               |
| 13.5 | Undecane                                | nd              | 0.242<br>±0.022 | nd              | nd               | nd               | nd              | nd              | nd               | nd               |
| 14.4 | Butanoic acid pentyl ester              | nd              | 0.406<br>±0.038 | nd              | nd              | nd               | nd               | nd              | nd              | nd               | 0.082<br>±0.006  |
| 14.5 | 5,5,6-Trimethylhept-3-en-2-one          | nd              | nd              | nd              | nd              | nd              | 0.183<br>±0.014 | 0.122<br>±0.008 | 0.175<br>±0.017 | 0.185<br>±0.017 | 0.077<br>±0.006 | nd               | nd               | nd              | nd              | nd               | 0.033<br>±0.002  |
| 15.2 | Benzoic acid ethyl ester                | 0.418<br>±0.033 | nd              | nd              | 0.338<br>±0.031 | nd              | nd              | nd              | nd              | 0.925<br>±0.083 | nd              | nd               | 0.130<br>±0.008  | 0.659<br>±0.062 | nd              | 0.735<br>±0.054  | nd               |
| 15.3 | Butanedioic acid diethyl ester          | nd              | nd              | nd              | 0.510<br>±0.046 | nd               | nd               | nd              | nd              | 0.449<br>±0.033  | nd               |
| 15.5 | Hexylbutyrate                           | nd              | 0.129<br>±0.012 | nd              | nd              | nd               | nd               | nd              | nd              | nd               | nd               |
| 15.8 | Dodecane                                | 0.299<br>±0.024 | 0.272<br>±0.019 | nd              | nd              | nd              | nd              | nd              | nd              | 0.432<br>±0.039 | 0.212<br>±0.017 | 0.157<br>±0.011  | 0.041<br>±0.002  | 0.172<br>±0.016 | nd              | 0.098<br>±0.007  | 0.058<br>±0.004  |
| 15.9 | Decanal                                 | nd              | 0.240<br>±0.017 | 0.272<br>±0.014 | 0.116<br>±0.011 | nd              | 0.357<br>±0.027 | 0.330<br>±0.021 | 0.133<br>±0.013 | 0.138<br>±0.012 | 0.444<br>±0.031 | 0.077<br>±0.005  | 0.444<br>±0.005  | nd              | nd              | nd               | nd               |
| 16.0 | 2-(ethylthio)propanoic acid ethyl ester | nd               | 0.088<br>±0.005  | nd              | nd              | nd               | nd               |
| 16.2 | Sorbic acid vinyl ester                 | nd               | 0.115<br>±0.007  | nd              | nd              | nd               | nd               |
| 16.5 | Benzothiazole                           | nd               | 0.036<br>±0.002  | nd              | nd              | nd               | nd               |
| 16.8 | Benzeneacetic acid ethyl ester          | nd              | 0.145<br>±0.012  | 0.049<br>±0.003  | nd              | nd              | 0.149<br>±0.011  | nd               |
| 17.0 | 4a,5-Dimethylhexahydro-                 | nd              | 0.506<br>±0.035 | 0.347<br>±0.017 | 0.147<br>±0.013 | nd              | 0.389<br>±0.029 | 0.278<br>±0.018 | 0.062<br>±0.006 | nd              | nd              | 0.240<br>±0.011  | nd               | nd              | nd              | nd               | nd               |

| 4H-1,3-benzodioxin-4-one |                                                                                 |                 |                 |                 |                 |                 |                 |                 |                 |                 |                 |                 |                 |                 |                 |                 |                 |
|--------------------------|---------------------------------------------------------------------------------|-----------------|-----------------|-----------------|-----------------|-----------------|-----------------|-----------------|-----------------|-----------------|-----------------|-----------------|-----------------|-----------------|-----------------|-----------------|-----------------|
| 17.2                     | Dec-(2E)-enal                                                                   | nd              | nd              | 0.133<br>±0.007 | nd              | nd              | 0.206<br>±0.015 | 0.631<br>±0.041 | 0.109<br>±0.011 | 0.330<br>±0.029 | nd              | nd              | nd              | nd              | nd              | nd              | 0.033<br>±0.002 |
| 17.6                     | 4,6-dimethyldodecane                                                            | 0.871<br>±0.069 | nd              | nd              | nd              | nd              | nd              | nd              | 0.179<br>±0.017 | 0.379<br>±0.034 | 0.485<br>±0.039 | nd              | nd              | nd              | nd              | nd              | nd              |
| 17.8                     | 2-Undecanone                                                                    | nd              | 2.30<br>±0.16   | nd              | nd              | nd              | nd              | nd              |
| 17.9                     | Benzo-2,3-pyrrole                                                               | nd              | nd              | nd              | 0.805<br>±0.072 | nd              | 0.094<br>±0.006 | nd              | nd              | nd              | nd              |
| 18.0                     | Tridecane                                                                       | 0.150<br>±0.012 | 0.173<br>±0.012 | nd              | nd              | nd              | 0.114<br>±0.009 | 0.085<br>±0.006 | 0.091<br>±0.009 | 0.304<br>±0.027 | 0.198<br>±0.016 | 0.149<br>±0.011 | nd              | 0.164<br>±0.016 | 0.173<br>±0.015 | 0.119<br>±0.009 | 0.033<br>±0.002 |
| 19.3                     | n-Decanoic acid                                                                 | 0.233<br>±0.019 | 1.05<br>±0.07   | 0.380<br>±0.019 | 0.259<br>±0.023 | 0.495<br>±0.042 | 0.629<br>±0.047 | 0.208<br>±0.014 | nd              | 0.069<br>±0.006 | 0.581<br>±0.046 | 0.115<br>±0.008 | nd              | 0.191<br>±0.018 | 0.163<br>±0.014 | 0.264<br>±0.021 | nd              |
| 19.6                     | cis-4,5-Epoxy-(E)-2-decenal                                                     | nd              | 0.175<br>±0.012 | 0.658<br>±0.033 | 0.121<br>±0.011 | nd              | 0.364<br>±0.027 | 0.964<br>±0.063 | 0.338<br>±0.032 | nd              | nd              | 0.111<br>±0.007 | nd              | nd              | 0.297<br>±0.026 | 0.092<br>±0.007 | 0.069<br>±0.005 |
| 19.812                   | Butyl caprylate                                                                 | nd              | 0.136<br>±0.009 |
| 19.9                     | Ethyl decanoate                                                                 | nd              | nd              | nd              | 0.095<br>±0.009 | nd              | nd              | 0.044<br>±0.003 | 0.339<br>±0.031 | nd              |
| 20.0                     | Tetradecane                                                                     | 0.361<br>±0.028 | 0.431<br>±0.031 | 0.345<br>±0.017 | 0.281<br>±0.025 | nd              | nd              | nd              | 0.238<br>±0.023 | 0.655<br>±0.059 | 0.555<br>±0.044 | 0.468<br>±0.033 | 0.095<br>±0.009 | 0.333<br>±0.032 | 0.351<br>±0.031 | 0.259<br>±0.019 | 0.303<br>±0.021 |
| 20.3                     | 2,4,7,9-Tetramethyl-5-decyn-4,7-diol                                            | nd              | 0.250<br>±0.023 | 0.301<br>±0.024 | 0.275<br>±0.019 | nd              | 0.155<br>±0.015 | nd              | 0.146<br>±0.011 | nd              |
| 21.2                     | 2,6,10-trimethyldodecane,                                                       | nd              | 0.149<br>±0.013 | nd              | 0.095<br>±0.007 | 0.031<br>±0.003 | nd              | 0.143<br>±0.012 | nd              | 0.018<br>±0.001 |
| 22.2                     | 2,4-bis(1,1-dimethylethyl)phenol                                                | nd              | 0.150<br>±0.012 | 0.092<br>±0.006 | nd              | nd              | nd              | nd              | nd              |
| 22.7                     | Pentadecane                                                                     | nd              | 0.080<br>±0.007 | 0.161<br>±0.013 | 0.099<br>±0.007 | 0.029<br>±0.003 | 0.177<br>±0.017 | 0.117<br>±0.011 | nd              | nd              |
| 23.4                     | (Z)-3-Hexadecene                                                                | nd              | 0.077<br>±0.005 |
| 23.7                     | Hexadecane                                                                      | nd              | 0.185<br>±0.018 | nd              | nd              | 0.430<br>±0.029 |
| 23.8                     | Propanoic acid, 2-methyl-, 1-(1,1-dimethylethyl)-2-methyl-1,3-propanediyl ester | nd              | 0.013<br>±0.001 |

Volatile compounds, which in at least in one wheat wholemeal sample are >5% (LUHS29 – fermented with *Pediococcus acidilactici* LUHS29 strain; LUHS245 – fermented with *Lactobacillus uvarum* LUHS245 strain; LUHS122 – fermented with *Lactobacillus plantarum* LUHS122 strain. Data are represented as means (n = 3)).

**Table S12.** The influence of the wheat variety and type of LAB on the acidity, chromaticity, and microbiological characteristics of the WW samples.

| Dependent Variable             | Significance (p) of<br>the wheat variety | Significance (p) of<br>the type of LAB | Significance of the wheat variety *<br>The type of LAB interaction |
|--------------------------------|------------------------------------------|----------------------------------------|--------------------------------------------------------------------|
| Acetic acid                    | 0.0001                                   | 0.0001                                 | 0.0001                                                             |
| 1-Butanol                      | 0.0001                                   | 0.0001                                 | 0.0001                                                             |
| Acetoin                        | 0.0001                                   | 0.0001                                 | 0.0001                                                             |
| 1-Pentanol                     | 0.0001                                   | 0.0001                                 | 0.0001                                                             |
| 2,3-Butanediol                 | 0.0001                                   | 0.0001                                 | 0.0001                                                             |
| Hexanal                        | 0.0001                                   | 0.0001                                 | 0.0001                                                             |
| Ethyl butyrate                 | 0.0001                                   | 0.0001                                 | 0.0001                                                             |
| Ethyl lactate                  | 0.0001                                   | 0.0001                                 | 0.0001                                                             |
| Butanoic acid                  | 0.0001                                   | 0.0001                                 | 0.0001                                                             |
| 1-Hexanol                      | 0.132                                    | 0.003                                  | 0.026                                                              |
| L-Lactic acid                  | 0.998                                    | 0.0001                                 | 0.0001                                                             |
| 4-methylpentanoic acid         | 0.0001                                   | 0.0001                                 | 0.0001                                                             |
| 2-Heptenal                     | 0.797                                    | 0.012                                  | 0.0001                                                             |
| Hexanoic acid                  | 0.0001                                   | 0.0001                                 | 0.0001                                                             |
| 2-pentylfuran                  | 0.004                                    | 0.0001                                 | 0.007                                                              |
| Butylbutanoate                 | 0.0001                                   | 0.0001                                 | 0.0001                                                             |
| Hexanoic acid ethyl ester      | 0.0001                                   | 0.0001                                 | 0.0001                                                             |
| 3-ethyl-2-methyl-1,3-hexadiene | 0.0001                                   | 0.0001                                 | 0.0001                                                             |
| Benzeneacetaldehyde            | 0.0001                                   | 0.0001                                 | 0.0001                                                             |
| Oct-(2E)-enal                  | 0.005                                    | 0.0001                                 | 0.0001                                                             |
| 4-ethylguaiaicol               | 0.0001                                   | 0.0001                                 | 0.0001                                                             |
| Deca-(2E,4E)-dien-1-ol         | 0.0001                                   | 0.139                                  | 0.0001                                                             |
| 4-vinylguaiaicol               | 0.003                                    | 0.074                                  | 0.003                                                              |
| 2,5-dimethylpyrazine           | 0.0001                                   | 0.0001                                 | 0.0001                                                             |
| Benzaldehyde                   | 0.0001                                   | 0.0001                                 | 0.0001                                                             |
| 1-Heptanol                     | 0.0001                                   | 0.0001                                 | 0.0001                                                             |
| 1-Octen-3-ol                   | 0.003                                    | 0.0001                                 | 0.0001                                                             |
| 4-methylhexanoic acid          | 0.023                                    | 0.030                                  | 0.010                                                              |
| Heptanoic acid                 | 0.031                                    | 0.0001                                 | 0.003                                                              |
| 2-Nonanone                     | 0.0001                                   | 0.0001                                 | 0.0001                                                             |
| Nonanal                        | 0.0001                                   | 0.0001                                 | 0.0001                                                             |
| Phenethyl alcohol              | 0.0001                                   | 0.002                                  | 0.0001                                                             |
| (E)-2-Nonenal                  | 0.022                                    | 0.070                                  | 0.0001                                                             |
| 4-ethylphenol                  | 0.0001                                   | 0.0001                                 | 0.0001                                                             |
| Octanoic acid                  | 0.0001                                   | 0.069                                  | 0.010                                                              |
| Ethyl octanoate                | 0.941                                    | 0.006                                  | 0.009                                                              |
| (E,E)-2,4-Nonadienal           | 0.0001                                   | 0.0001                                 | 0.0001                                                             |
| Nonanoic acid                  | 0.001                                    | 0.0001                                 | 0.0001                                                             |
| (E,E)-2,4-Decadienal           | 0.0001                                   | 0.0001                                 | 0.0001                                                             |

|                                                                |        |        |        |
|----------------------------------------------------------------|--------|--------|--------|
| 4-methyl-1-(pent-4-en-1-yl)-2,3-Diazabicyclo[2.2.1] hept-2-ene | 0.0001 | 0.0001 | 0.0001 |
| 4-ethyl-3-Nonen-5-yne                                          | 0.0001 | 0.0001 | 0.0001 |
| Ethylhydrocinnamate                                            | 0.0001 | 0.002  | 0.0001 |
| dihydro-5-pentyl-2(3H)-Furanone                                | 0.171  | 0.005  | 0.0001 |
| trans-4,5-Epoxy-(E)-2-decenal                                  | 0.0001 | 0.0001 | 0.0001 |
| Dodecanoic acid                                                | 0.0001 | 0.0001 | 0.0001 |
| 3-methylbutanoic acid                                          | 0.0001 | 0.0001 | 0.0001 |
| 2-methylbutanoic acid                                          | 0.0001 | 0.0001 | 0.0001 |
| Pentanoic acid                                                 | 0.029  | 0.028  | 0.001  |
| Heptanal                                                       | 0.0001 | 0.0001 | 0.0001 |
| (E,E)-2,4-heptadienal                                          | 0.0001 | 0.001  | 0.0001 |
| Hexyl acetate                                                  | 0.0001 | 0.0001 | 0.0001 |
| Acetic acid hexyl ester                                        | 0.0001 | 0.0001 | 0.0001 |
| Oct-3-en-2-one                                                 | 0.0001 | 0.0001 | 0.0001 |
| (E)-2-Octen-1-ol                                               | 0.0001 | 0.0001 | 0.0001 |
| 1-Octanol                                                      | 0.0001 | 0.0001 | 0.0001 |
| 2-butyltetrahydrofuran                                         | 0.0001 | 0.0001 | 0.0001 |
| Heptanoic acid ethyl ester                                     | 0.0001 | 0.0001 | 0.0001 |
| (Z)-2-Nonen-4-yn-1-ol                                          | 0.005  | 0.010  | 0.0001 |
| Undecane                                                       | 0.011  | 0.008  | 0.001  |
| Butanoic acid pentyl ester                                     | 0.0001 | 0.0001 | 0.0001 |
| 5,5,6-Trimethylhept-3-en-2-one                                 | 0.0001 | 0.0001 | 0.0001 |
| Benzoic acid ethyl ester                                       | 0.0001 | 0.0001 | 0.0001 |
| Butanedioic acid diethyl ester                                 | 0.0001 | 0.0001 | 0.0001 |
| Hexylbutyrate                                                  | 0.0001 | 0.0001 | 0.0001 |
| Dodecane                                                       | 0.0001 | 0.0001 | 0.0001 |
| Decanal                                                        | 0.0001 | 0.0001 | 0.0001 |
| 2-(ethylthio)propanoic acid ethyl ester                        | 0.0001 | 0.0001 | 0.0001 |
| Sorbic acid vinyl ester                                        | 0.0001 | 0.0001 | 0.0001 |
| Benzothiazole                                                  | 0.0001 | 0.0001 | 0.0001 |
| Benzeneacetic acid ethyl ester                                 | 0.0001 | 0.0001 | 0.0001 |
| 4a,5-Dimethylhexahydro-4H-1,3-benzodioxin-4-one                | 0.0001 | 0.0001 | 0.001  |
| Dec-(2E)-enal                                                  | 0.001  | 0.080  | 0.001  |
| 4,6-dimethyldodecane                                           | 0.0001 | 0.000  | 0.0001 |
| 2-Undecanone                                                   | 0.010  | 0.007  | 0.0001 |
| Benzo-2,3-pyrrole                                              | 0.0001 | 0.0001 | 0.0001 |
| Tridecane                                                      | 0.0001 | 0.0001 | 0.0001 |
| n-Decanoic acid                                                | 0.0001 | 0.0001 | 0.0001 |
| cis-4,5-Epoxy-(E)-2-decenal                                    | 0.0001 | 0.0001 | 0.0001 |
| Butyl caprylate                                                | 0.0001 | 0.0001 | 0.0001 |
| Ethyl decanoate                                                | 0.0001 | 0.0001 | 0.0001 |
| Tetradecane                                                    | 0.0001 | 0.050  | 0.0001 |

|                                                                                                                                                                            |        |        |        |
|----------------------------------------------------------------------------------------------------------------------------------------------------------------------------|--------|--------|--------|
| 2,4,7,9-Tetramethyl-5-decyn-4,7-diol                                                                                                                                       | 0.0001 | 0.0001 | 0.0001 |
| 2,6,10-trimethyldodecane,                                                                                                                                                  | 0.0001 | 0.0001 | 0.0001 |
| 2,4-bis(1,1-dimethylethyl)phenol                                                                                                                                           | 0.0001 | 0.004  | 0.0001 |
| Pentadecane                                                                                                                                                                | 0.0001 | 0.0001 | 0.0001 |
| (Z)-3-Hexadecene                                                                                                                                                           | 0.0001 | 0.0001 | 0.0001 |
| Hexadecane                                                                                                                                                                 | 0.0001 | 0.010  | 0.001  |
| Propanoic acid, 2-methyl-, 1-(1,1-dimethylethyl)-2-methyl-1,3-propanediyl ester                                                                                            | 0.0001 | 0.0001 | 0.0001 |
| LAB – lactic acid bacteria. The influence of analysed factors and their interaction is significant, when $p \leq 0.05$ . In blue colour marked values are not significant. |        |        |        |
