# Supplementary material for: Comparison Study of Nontreated and Fermented Wheat Varieties ‘Ada’, ‘Sarta’, and New Breed Blue and Purple Wheat Lines Wholemeal Flour
Source: MDPI journal article supplement (doi:10.3390/biology11070966), 2022-06-27
Supplement: s1 [file s1]

| Wheat Samples                                                                                                                                                                                                                                                                                                                                                                                                                                                                                                                                                                                                          | Fatty Acids Concentration, % from Total Fat Content |            |              |              |            |                 |           |             |            |              |              |              |              |            | SFA   | MUFA  | PUFA  | omega 3 | omega 6 | omega 9 |
|------------------------------------------------------------------------------------------------------------------------------------------------------------------------------------------------------------------------------------------------------------------------------------------------------------------------------------------------------------------------------------------------------------------------------------------------------------------------------------------------------------------------------------------------------------------------------------------------------------------------|-----------------------------------------------------|------------|--------------|--------------|------------|-----------------|-----------|-------------|------------|--------------|--------------|--------------|--------------|------------|-------|-------|-------|---------|---------|---------|
|                                                                                                                                                                                                                                                                                                                                                                                                                                                                                                                                                                                                                        | C14:0                                               | C16:0      | C16:1        | C17:0        | C18:0      | C18:1 cis-trans | C18:2     | C18:3 γ     | C18:3 α    | C20:0        | C20:1        | C20:4        | C22:0        | C22:1      |       |       |       |         |         |         |
| Traditional Wheat Variety                                                                                                                                                                                                                                                                                                                                                                                                                                                                                                                                                                                              |                                                     |            |              |              |            |                 |           |             |            |              |              |              |              |            |       |       |       |         |         |         |
| ‘Ada’                                                                                                                                                                                                                                                                                                                                                                                                                                                                                                                                                                                                                  | 2.93 ±0.01                                          | 28.4 ±0.1  | 0.771 ±0.002 | nd           | 8.51 ±0.03 | 21.7 ±0.1       | 34.8 ±0.2 | nd          | 2.11 ±0.01 | nd           | 0.594 ±0.002 | nd           | nd           | nd         | 39.95 | 23.12 | 36.93 | 2.11    | 34.82   | 23.12   |
| ‘Ada’ <sup>LUHS29</sup>                                                                                                                                                                                                                                                                                                                                                                                                                                                                                                                                                                                                | 0.236 ±0.001                                        | 23.7 ±0.1  | nd           | nd           | 5.76 ±0.02 | 16.9 ±0.1       | 50.7 ±0.2 | nd          | 2.55 ±0.02 | nd           | nd           | nd           | nd           | nd         | 29.74 | 16.94 | 53.31 | 2.56    | 50.76   | 16.94   |
| ‘Ada’ <sup>LUHS245</sup>                                                                                                                                                                                                                                                                                                                                                                                                                                                                                                                                                                                               | 0.430 ±0.003                                        | 22.1 ±0.1  | 0.228 ±0.002 | nd           | 8.72 ±0.24 | 20.4 ±0.1       | 44.1 ±0.2 | nd          | 3.09 ±0.1  | 0.125 ±0.002 | 0.617 ±0.003 | nd           | nd           | nd         | 31.42 | 21.33 | 47.25 | 3.09    | 44.15   | 21.33   |
| ‘Ada’ <sup>LUHS122</sup>                                                                                                                                                                                                                                                                                                                                                                                                                                                                                                                                                                                               | 1.37 ±0.04                                          | 27.2 ±0.2  | nd           | nd           | 7.00 ±0.10 | 17.1 ±0.2       | 44.8 ±0.3 | nd          | 2.07 ±0.1  | nd           | 0.592 ±0.002 | nd           | nd           | nd         | 39.95 | 23.12 | 36.93 | 2.11    | 34.82   | 23.12   |
| Waxy Wheat Variety                                                                                                                                                                                                                                                                                                                                                                                                                                                                                                                                                                                                     |                                                     |            |              |              |            |                 |           |             |            |              |              |              |              |            |       |       |       |         |         |         |
| ‘Sarta’                                                                                                                                                                                                                                                                                                                                                                                                                                                                                                                                                                                                                | 0.819 ±0.003                                        | 19.4 ±0.10 | 0.245 ±0.002 | 0.022 ±0.001 | 3.37 ±0.02 | 14.6 ±0.1       | 54.1 ±0.2 | 0.082 ±0.01 | 6.23 ±0.03 | 0.111 ±0.003 | 0.597 ±0.002 | 0.149 ±0.005 | 0.190 ±0.001 | nd         | 23.88 | 15.46 | 60.66 | 6.23    | 54.43   | 15.46   |
| ‘Sarta’ <sup>LUHS29</sup>                                                                                                                                                                                                                                                                                                                                                                                                                                                                                                                                                                                              | nd                                                  | 19.1 ±0.1  | nd           | nd           | 2.25 ±0.02 | 12.8 ±0.1       | 59.2 ±0.2 | nd          | 5.27 ±0.02 | nd           | 1.34 ±0.01   | nd           | nd           | nd         | 21.32 | 14.18 | 64.50 | 5.27    | 59.23   | 14.18   |
| ‘Sarta’ <sup>LUHS245</sup>                                                                                                                                                                                                                                                                                                                                                                                                                                                                                                                                                                                             | nd                                                  | 22.5 ±0.1  | nd           | nd           | 8.47 ±0.2  | 21.1 ±0.2       | 45.1 ±0.3 | nd          | 2.84 ±0.02 | nd           | nd           | nd           | nd           | nd         | 30.92 | 21.12 | 47.95 | 2.84    | 45.11   | 21.12   |
| ‘Sarta’ <sup>LUHS122</sup>                                                                                                                                                                                                                                                                                                                                                                                                                                                                                                                                                                                             | nd                                                  | 24.0 ±0.1  | nd           | nd           | 3.86 ±0.2  | 18.0 ±0.1       | 50.2 ±0.2 | nd          | 2.94 ±0.01 | nd           | 0.889 ±0.003 | nd           | nd           | nd         | 27.87 | 18.90 | 53.23 | 2.94    | 50.29   | 18.90   |
| Blue Wheat - New Bred Line                                                                                                                                                                                                                                                                                                                                                                                                                                                                                                                                                                                             |                                                     |            |              |              |            |                 |           |             |            |              |              |              |              |            |       |       |       |         |         |         |
| DS8472-5                                                                                                                                                                                                                                                                                                                                                                                                                                                                                                                                                                                                               | nd                                                  | 25.3 ±0.2  | nd           | nd           | 7.23 ±0.12 | 19.9 ±0.1       | 44.7 ±0.3 | nd          | 2.73 ±0.01 | nd           | nd           | nd           | nd           | nd         | 32.57 | 19.99 | 47.44 | 2.73    | 44.71   | 19.99   |
| DS8472-5 <sup>LUHS29</sup>                                                                                                                                                                                                                                                                                                                                                                                                                                                                                                                                                                                             | nd                                                  | 20.8 ±0.2  | nd           | nd           | 4.71 ±0.03 | 18.4 ±0.1       | 52.5 ±0.2 | nd          | 2.93 ±0.04 | nd           | 0.634 ±0.002 | nd           | nd           | nd         | 25.49 | 19.08 | 55.43 | 2.93    | 52.50   | 19.08   |
| DS8472-5 <sup>LUHS245</sup>                                                                                                                                                                                                                                                                                                                                                                                                                                                                                                                                                                                            | 2.42 ±0.08                                          | 24.0 ±0.1  | 0.311 ±0.002 | nd           | 5.52 ±0.16 | 18.3 ±0.2       | 45.9 ±0.3 | nd          | 2.89 ±0.02 | nd           | 0.533 ±0.003 | nd           | nd           | nd         | 31.98 | 19.14 | 48.87 | 2.89    | 45.99   | 19.14   |
| DS8472-5 <sup>LUHS122</sup>                                                                                                                                                                                                                                                                                                                                                                                                                                                                                                                                                                                            | nd                                                  | 21.0 ±0.2  | nd           | nd           | 3.96 ±0.11 | 17.4 ±0.1       | 54.1 ±0.2 | nd          | 3.38 ±0.02 | nd           | nd           | nd           | nd           | nd         | 25.01 | 17.48 | 57.52 | 3.38    | 54.14   | 17.48   |
| Purple Wheat - New Bred Line                                                                                                                                                                                                                                                                                                                                                                                                                                                                                                                                                                                           |                                                     |            |              |              |            |                 |           |             |            |              |              |              |              |            |       |       |       |         |         |         |
| DS8526-2                                                                                                                                                                                                                                                                                                                                                                                                                                                                                                                                                                                                               | 2.17 ±0.03                                          | 22.8 ±0.1  | 0.114 ±0.002 | nd           | 5.28 ±0.15 | 21.5 ±0.2       | 44.7 ±0.3 | nd          | 2.69 ±0.03 | nd           | 0.611 ±0.004 | nd           | nd           | nd         | 30.21 | 22.31 | 47.48 | 2.69    | 44.80   | 22.31   |
| DS8526-2 <sup>LUHS29</sup>                                                                                                                                                                                                                                                                                                                                                                                                                                                                                                                                                                                             | nd                                                  | 16.4 ±0.1  | nd           | nd           | 4.40 ±0.03 | 19.3 ±0.1       | 42.8 ±0.2 | nd          | 7.45 ±0.05 | nd           | 2.36 ±0.08   | nd           | nd           | 7.12 ±0.04 | 20.83 | 28.89 | 50.29 | 7.45    | 42.83   | 28.89   |
| DS8526-2 <sup>LUHS245</sup>                                                                                                                                                                                                                                                                                                                                                                                                                                                                                                                                                                                            | 1.19 ±0.02                                          | 20.3 ±0.2  | 0.315 ±0.006 | nd           | 4.95 ±0.08 | 23.5 ±0.2       | 45.5 ±0.3 | nd          | 2.80 ±0.02 | nd           | 0.600 ±0.004 | 0.622 ±0.003 | nd           | nd         | 26.49 | 24.51 | 49.01 | 2.81    | 46.20   | 24.51   |
| DS8526-2 <sup>LUHS122</sup>                                                                                                                                                                                                                                                                                                                                                                                                                                                                                                                                                                                            | nd                                                  | 17.7 ±0.1  | nd           | nd           | 4.09 ±0.12 | 20.2 ±0.2       | 53.8 ±0.3 | nd          | 3.28 ±0.07 | nd           | 0.824 ±0.003 | nd           | nd           | nd         | 21.76 | 21.06 | 57.18 | 3.29    | 53.89   | 21.06   |
| LUHS29 – fermented with <i>Pediococcus acidilactici</i> LUHS29 strain; LUHS245 – fermented with <i>Lactobacillus uvarum</i> LUHS245strain; LUHS122 – fermented with <i>Lactobacillus plantarum</i> LUHS122 strain; C14:0 – methyl tetradecanoate; C16:0 – methyl palmitate; C16:1– methyl palmitoleate; C17:0 – methyl heptadecanoate; C18:0 – methyl stearate; C18:1 – cis-trans-9- oleic acid methyl ester; C18:2 – methyl linoleate; C18:3 γ – gamma- linolenic acid methyl ester C18:3 α – alfa linolenic acid methyl ester; C20:0 – eicosanoic acid methyl ester; C20:1 – cis-11-eicosenoic acid methyl ester; C2 |                                                     |            |              |              |            |                 |           |             |            |              |              |              |              |            |       |       |       |         |         |         |

Data are represented as means ( $n = 3$ )  $\pm$  SE. <sup>a-c</sup> Means with different letters in column are significantly different between the same variety non-treated and fermented samples ( $p \leq 0.05$ ). <sup>A-D</sup> Means with different letters in column are significantly different between the different variety samples (between non-treated and between with the same LAB strain treated samples) ( $p \leq 0.05$ ).

**Table S8.** The influence of the wheat variety and type of LAB on the fatty acids content in WW samples.

| Source                          | Dependent Variable | p      |
|---------------------------------|--------------------|--------|
| Wheat variety                   | C14:0              | 0.0001 |
|                                 | C16:0              | 0.610  |
|                                 | C16:1              | 0.0001 |
|                                 | C17:0              | 0.0001 |
|                                 | C18:0              | 0.0001 |
|                                 | C18:1 cis-trans    | 0.201  |
|                                 | C18:2              | 0.757  |
|                                 | C18:3 $\gamma$     | 0.0001 |
|                                 | C18:3 $\alpha$     | 0.064  |
|                                 | C20:0              | 0.0001 |
|                                 | C20:1              | 0.002  |
|                                 | C20:4              | 0.0001 |
|                                 | C22:0              | 0.004  |
|                                 | C22:1              | 0.0001 |
| The type of LAB                 | C14:0              | 0.0001 |
|                                 | C16:0              | 0.118  |
|                                 | C16:1              | 0.0001 |
|                                 | C17:0              | 0.0001 |
|                                 | C18:0              | 0.0001 |
|                                 | C18:1 cis-trans    | 0.033  |
|                                 | C18:2              | 0.239  |
|                                 | C18:3 $\gamma$     | 0.0001 |
|                                 | C18:3 $\alpha$     | 0.515  |
|                                 | C20:0              | 0.0001 |
|                                 | C20:1              | 0.0001 |
|                                 | C20:4              | 0.0001 |
|                                 | C22:0              | 0.004  |
|                                 | C22:1              | 0.0001 |
| Wheat variety * The type of LAB | C14:0              | 0.0001 |
|                                 | C16:0              | 0.781  |
|                                 | C16:1              | 0.0001 |
|                                 | C17:0              | 0.0001 |
|                                 | C18:0              | 0.0001 |
|                                 | C18:1 cis-trans    | 0.305  |
|                                 | C18:2              | 0.193  |
|                                 | C18:3 $\gamma$     | 0.0001 |
|                                 | C18:3 $\alpha$     | 0.569  |
|                                 | C20:0              | 0.0001 |
|                                 | C20:1              | 0.0001 |
|                                 | C20:4              | 0.0001 |
|                                 | C22:0              | 0.0001 |
|                                 | C22:1              | 0.0001 |

C14:0 – methyl tetradecanoate; C16:0 – methyl palmitate; C16:1– methyl palmitoleate; C17:0 – methyl heptadecanoate; C18:0 – methyl stearate; C18:1 – cis-trans-9- oleic acid methyl ester; C18:2 – methyl linoleate; C18:3  $\gamma$  – gamma- linolenic acid methyl ester C18:3  $\alpha$  – alfa linolenic acid methyl ester; C20:0 – eicosanoic acid methyl ester; C20:1 – cis-11-eicosenoic acid methyl ester; C20:4 – cis-5.8.11.14-eicosatetraenoic acid methyl ester; C22:0 – methyl docosanoate; C22:1 – cis-13-docosenoic acid methyl ester.

The influence of analysed factors and their interaction is significant, when  $p \leq 0.05$ .
